# Supplementary material for: Programmable base editing of zebrafish genome using a modified CRISPR-Cas9 system
Source: PubMed Central journal article supplement (PMC5524635; doi:10.1038/s41467-017-00175-6), 2017-07-25
Supplement: 41467_2017_175_MOESM2_ESM.pdf [file 41467_2017_175_MOESM2_ESM.pdf]

File name: Supplementary Information

Description: Supplementary tables.

File name: Peer review file

Description:

**Supplementary Table 1. Target sites in this study.** Red colors means PAM sequences.

| Gene name       | Target sites                      |
|-----------------|-----------------------------------|
| <i>twist2-1</i> | gGCTCCAGAACCAAGCGCGTCC <b>TGG</b> |
| <i>twist2-2</i> | gGCCGCTCGCGTACGTT <b>CGCCAGG</b>  |
| <i>twist2-3</i> | GCGTCCTGGCGAACGTACG <b>CGA</b>    |
| <i>gdf6</i>     | GGTCGATCAGAGAGGCCA <b>CTGG</b>    |
| <i>ntl</i>      | GGAACCAGCCACCGACTGT <b>TGG</b>    |
| <i>tyr</i>      | GGCAATCCCGGGGACCA <b>CGACCGG</b>  |
| <i>urod-1</i>   | GAGATCGTGAGGAGGATGTT <b>GGA</b>   |
| <i>urod-2</i>   | GTTCCCTGAAGCTTGCTG <b>TGA</b>     |
| <i>tial1</i>    | GGCCTCCGTAA <b>CATCCCTGGAGA</b>   |

**Supplementary Table 2. Primers used in this study.**

| Name                 | Sequence of the primer (5'-3')                              |
|----------------------|-------------------------------------------------------------|
| <i>twist2-1</i> gRNA | TAATACGACTCACTATAgGCTCCAGAACCAAGCGCGTCC GTTTTAGAGCTA        |
| <i>twist2-2</i> gRNA | TAATACGACTCACTATAgGCCGCTCGCGTACGTT <b>CGCC</b> GTTTTAGAGCTA |
| <i>gdf6</i> gRNA     | TAATACGACTCACTATAgGTCGATCAGAGAGGCCACGTTTTAGAGCTA            |
| <i>ntl</i> gRNA      | TAATACGACTCACTATAGGAACCAGCCACCGACTGT GTTTTAGAGCTA           |
| <i>tyr</i> gRNA      | TAATACGACTCACTATAgGCAATCCCGGGGACCA <b>CGAC</b> GTTTTAGAGCTA |
| <i>twist2-3</i> gRNA | TAATACGACTCACTATAgGCGTCCTGGCGAACGTACGTTTTAGAGCTA            |
| <i>urod-1</i> gRNA   | TAATACGACTCACTATAgGAGATCGTGAGGAGGATGTT GTTTTAGAGCTA         |
| <i>urod-2</i> gRNA   | TAATACGACTCACTATAgGTTCCCTGAAGCTTGCTG GTTTTAGAGCTA           |
| <i>tial1</i> gRNA    | TAATACGACTCACTATAGGCCTCCGTAA <b>CATCCCTGG</b> GTTTTAGAGCTA  |
| tracr rev            | AAAAAAAAAGCACCGACTCGGTGCCAC                                 |
| <i>twist2</i> detect | F: AAGTGGAGATCGTATTTTCTC                                    |
|                      | R: GTTCGGCATTATCAGGACGCG                                    |
| <i>gdf6</i> detect   | F: GCTCTCTCCTTTGCGAA GAC                                    |
|                      | R: AATCCCCCAAACG <b>TCCAGAA</b>                             |
| <i>ntl</i> detect    | F: GCCAAAGCTTTCCTCGATGC                                     |
|                      | R: TTGCTCTTACTGGTGGTAGTGC                                   |
| <i>tyr</i> detect    | F: TGAAAGTTACAACCTCCGCGA                                    |
|                      | R: AGTCAGTGAAAGTCA <b>GGGAACA</b>                           |
| <i>urod-1</i> detect | F: CAAATTTAGGCCCTGCTGG                                      |
|                      | R: TTAGCGTTTGA GAA GCTGGC                                   |
| <i>urod-2</i> detect | F: GACTCCACAAGTCACATG <b>TTC</b>                            |

|                                                |                                                              |
|------------------------------------------------|--------------------------------------------------------------|
|                                                | R: AATGTAATGACACAGCCGT                                       |
| <i>tial1</i> detect                            | F: CCAGGGATGTTACGGA GGCC                                     |
|                                                | R: GGCCTCCGTAACATCCCTGG                                      |
| genotyping for<br><i>tyr</i> locus             | F: GCGTCTCACTCTCCTCGACTCTTC                                  |
|                                                | R: GTAGTTTCCGGCGCACTGGCA G                                   |
| VQR SpCas9<br>R1335Q,T1337R<br>double mutation | F:<br>GATAGAAAGcaGTACAgaTCCACTAAGGA GGTGCTGGACGCTACA CTGA    |
|                                                | R:<br>CCTTAGTGGAtcTGTA CtgCTTTCTATCGATTGTA GTGT CGAA GTACTTG |
| VQR SpCas9<br>D1135V                           | F: GGAGGCTTTGtCTCTCCCA CTGTGGCATACTCCGTCCTGGTG               |
|                                                | R: AGTGGGA GA GaCAAAGCCTCCATACTTCTTA GGGTCCCA GTC            |
| H840A mutation                                 | F: CGACGTGGATgcTATCGTCCCCA GA GTTTCATCAAAGATGAC              |
|                                                | R: GGGGACGATAgcATCCACGT CGTAATCAGACA GCCTGTTAATA             |
